1 Title: Age-related changes in human emotional egocentricity: evidence from  
2 multi-level neuroimaging

3 Abbreviated title: Age differences in the neural correlates of EEB  
4

5 **Authors:**

6 Federica Riva<sup>1</sup>, Melanie Lenger<sup>2</sup>, Martin Kronbichler<sup>3,4</sup>, Claus Lamm<sup>1†</sup>, Giorgia Silani<sup>5†</sup>

7 <sup>1</sup>*Social, Cognitive and Affective Neuroscience Unit, Department of Basic Psychological Research*  
8 *and Research Methods, University of Vienna, 1010 Vienna, Austria;*

9 <sup>2</sup>*Department of Psychiatry, Medical University of Graz, 8036 Graz, Austria*

10 <sup>3</sup>*Centre for Cognitive Neuroscience, University of Salzburg, 5020 Salzburg, Austria*

11 <sup>4</sup>*Neuroscience Institute, Christian Doppler Clinic, Paracelsus Medical University, 5020 Salzburg,*  
12 *Austria*

13 <sup>5</sup>*Department of Applied Psychology: Health, Development, Enhancement and Intervention,*  
14 *University of Vienna, 1010 Vienna, Austria*

15

16 †Senior authors who contributed equally to the present work

17 **Corresponding authors:**

18 Claus Lamm

19 Email: [claus.lamm@univie.ac.at](mailto:claus.lamm@univie.ac.at)

20 Giorgia Silani

21 Email: [giorgia.silani@univie.ac.at](mailto:giorgia.silani@univie.ac.at)

22

23 **Number of pages:** 33

24 **Figures:** 5 figures (1, 2a, 2b, 3, 4). **Tables:** 1 table (1)

25 Abstract: 249 words. Introduction: 592 words. Discussion: 1499 words.

26 **Conflict of interest statement**

27 The authors declare that the research was conducted in the absence of any commercial or financial  
28 relationships that could be construed as a potential conflict of interest.

29 **Acknowledgments**

30 The study was supported by the Austrian Science Fund (FWF, P 29150 to CL).

31

32 **Abstract**

33 Emotional egocentric bias (EEB) occurs when, due to a partial failure in self-other distinction,  
34 empathy for another's emotions is influenced by our own emotional state. Recent studies have  
35 demonstrated that this bias is higher in children, adolescents and older adults than in young adults.  
36 In the latter, overcoming emotional egocentrism has been associated with significant activity in the  
37 right supramarginal gyrus (rSMG), as well as increased connectivity between rSMG and  
38 somatosensory and visual cortices. Investigations on the neural correlates of EEB in adolescents and  
39 older adults are missing. We filled this gap, by asking female participants from three different age  
40 groups (adolescents, young adults and older adults, N=92) to perform a well-validated EEB task  
41 (Silani et al., 2013) in an MRI scanner. A multi-level analysis approach of MRI data including  
42 functional segregation, effective connectivity and structural analyses was adopted. Results revealed  
43 higher EEB in older compared to young adults and a comparable EEB in adolescents and young  
44 adults. Age-related differences in EEB were associated with differences in task-related rSMG  
45 connectivity with somatosensory cortices, especially with S2, which acted as a partial mediator  
46 between age and EEB. These findings provide further evidence for the crucial role of the rSMG in  
47 self-other distinction in the emotional domain, and suggest that the age-related decline in  
48 overcoming EEB is best explained by changes in rSMG connectivity rather than decreased regional  
49 activity in that area. This advocates a more systematic investigation of task-related connectivity in  
50 studies on aging and life-span development of social-cognitive phenomena.

51

52

## 53 Significance Statement

54 Empathy comprises both the ability to identify and share another's emotional state, and the ability  
55 to disentangle one's own from the other's emotional state. When self- and other-related emotions  
56 are conflicting, empathy might be negatively influenced by egocentric tendencies. This  
57 phenomenon is referred to as emotional egocentric bias (EEB), with previous research showing that  
58 its extent changes across the life-span. Here, we provide evidence that age-related differences in  
59 EEB are mainly associated with age-related changes in rSMG effective connectivity, and in particular  
60 that higher EEB in older adults is associated to lower rSMG effective connectivity with  
61 somatosensory cortices. These findings suggest the importance, particularly in aging, of intact  
62 functional connectivity for optimal socio-cognitive functioning.

63

64

65

66

67

68

69

70

71

72

73

74

75

76 Keywords (*up to 5*): aging, empathy, self-other distinction, fMRI, supramarginal gyrus

## 77 1. Introduction

78 Emotional egocentric biases (EEB) (Silani et al., 2013) occur when people's perception of others'  
79 emotions is biased by their own, conflicting emotions – such as, e.g., when someone is not able to  
80 fully empathize with a friend's discomfort for his/her recent break up because he/she has just  
81 gotten married. While many different views on empathy exist (Batson, 2009; Singer & Lamm, 2009,  
82 for a review), one prevailing definition sees empathy as an isomorphic affective state elicited by  
83 seeing or imaging someone else's affective state, and for which the empathizer is aware that the  
84 cause for her affective state lies in the other person's affective state (e.g., de Vignemont & Singer,  
85 2006). Thus, empathy entails at least two different aspects: i) identifying and sharing the affective  
86 state of the other (affective sharing) and ii) keeping separate self-experienced emotions from those  
87 experienced by the others (self-other distinction). EEB has been linked to a partial failure in self-  
88 other distinction (Silani et al., 2013; Steinbeis et al., 2014; Riva et al., 2016; von Mohr et al., 2019).  
89 Whereas some studies have addressed age-related changes in the neural underpinnings of affect  
90 sharing (Decety and Michalska, 2010; Chen et al., 2014; Tamm et al., 2017; Riva et al., 2018), less is  
91 known about age-related changes in emotional self-other distinction. This gap possibly is due to the  
92 paucity of suitable paradigms to measure it. Only recently, we have developed an experimental set-  
93 up allowing to detect EEB (Silani et al., 2013), as a proxy of self-other distinction failure. The main  
94 idea of this paradigm is to induce either conflicting or matching transient emotional states in pairs  
95 of participants, while they are asked to empathize with and to rate the other's emotions. On the  
96 behavioral level, two studies (Steinbeis et al., 2014; Hoffmann et al., 2015) using a similar task  
97 approach have shown that children display a higher EEB compared to young adults. Later in the  
98 lifespan, by means of a cross-sectional design including four groups (12-17 yrs., 20-30 yrs., 33-55  
99 yrs., 63-78 yrs.) we extended these findings to adolescents and older adults, showing that these two

100 age-groups display a higher EEB compared to young and middle-aged adults. The present study was  
101 directly motivated by the observed age-related differences in EEB, with its major aim being to  
102 unravel their neural underpinnings.

103 In this, our main hypotheses were based on previous work performed in healthy young adults  
104 (Silani et al., 2013, Steinbeis et al., 2014), which had shown that EEB is predominantly associated  
105 with activity in the right supramarginal gyrus (rSMG), and with increased connectivity of rSMG with  
106 somatosensory and visual cortices (Silani et al., 2013) and prefrontal areas (Steinbeis et al., 2014).  
107 Interestingly, particularly from a lifespan perspective, research on structural brain development  
108 showed that specific parts of the parietal lobule (Giedd et al., 1999), notably including the SMG  
109 (Gogtay et al., 2004), seem to reach full maturation toward the end of adolescence. Moreover, a  
110 linear reduction of gray matter volume of the same area has been observed during adulthood, with  
111 a consistent drop after the seventh decade (Courchesne et al., 2000) (Sowell et al., 2003). Taken  
112 together, these findings suggest that higher EEB in adolescents and older adults might be linked to  
113 age-related changes in structure, function and connectivity of the rSMG.

114 Therefore, we hypothesized higher EEB in adolescents and older adults to be related to lower  
115 recruitment and/or changes in connectivity of rSMG in comparison to a reference group of young  
116 adults. Finally, we hypothesized that the predicted differences in brain function are subtended by  
117 potential differences in brain structure.

118

## 119 2. Materials and Methods

### 120 2.1. Participants

121 Ninety-five female participants took part in the study. Subjects were part of three age cohorts:  
122 adolescents (AD, 14-17 years; N= 32), young adults (YA, 21-31 years; N=32), and older adults (OA,  
123 56-76 years; N=30). Only female participants were recruited for two reasons: consistency with our  
124 previous studies, using the same paradigm, in which we had investigated only females as well, (Silani  
125 et al., 2013; Riva et al., 2016), and acknowledged gender differences in empathy and socio-affective  
126 skills, including the EEB paradigm we used (e.g.: Schulte-Rüther et al., 2008; Tomova et al., 2014).  
127 Differing from our previous work (Riva et al., 2016), we did not add a group of middle-aged adults,  
128 since the extent of the EEB in young and middle-aged adults had been indistinguishable in that  
129 range. We thus decided to incorporate only younger adults as a reference group against which to  
130 compare the adolescent and older-aged group; younger adults instead of middle-aged adults were  
131 chosen both because previous imaging work (Silani et al., 2013; Steinbeis et al., 2014) had used this  
132 age range as well, and because they are easier to recruit. Three subjects had to be excluded from  
133 the analyses (two AD, one YA) for excessive movements (see fMRI analysis paragraph for exclusion  
134 criteria) during the scanning session. The final sample thus consisted of 31 AD (age range: 14-17  
135 years old; M= 15.61; SD= 1.03), 31 YA (age range: 21-31 years old; M = 24.52; SD = 2.41) and 30 OA  
136 (age range: 56-76 years old; M = 63.42; SD = 4.6). All the participants were right-handed (Oldfield,  
137 1971), had normal or corrected-to-normal vision, and reported no past or present neurological or  
138 psychiatric disorder. In addition, the German version of the Mini Mental State Examination (Kessler  
139 et al., 2000) was administered to older adults to control for initial stages of neurodegenerative  
140 disorders. Only participants with a score higher than 27 (maximum score = 30) were tested, as this

141 cut-off has been reported as most appropriate to screen for cognitive impairment (Kukull et al.,  
142 1994). Written consent was provided by participants, who received € 25 each for taking part in the  
143 study. The study had received approval by the local ethics committee and was carried out in  
144 accordance with the Declaration of Helsinki (latest revision, 2013).

## 145 2.2 Task and Procedure

146 The experimental session begun with the participant being introduced to an alleged other  
147 participant (a confederate of the study, from now on confederate) and the delivery of the  
148 instructions to both of them together, with the aim to get them acquainted. During the instructions,  
149 the experimenter explained that the participant and the confederate would have to perform the  
150 same task, with the participant lying inside and the confederate seated outside the MR scanner.  
151 After this initial phase, the participant was accompanied to the MR scanner room. Overall, the  
152 participants had to complete three tasks in the scanner: an empathy task, the EEB task, and an  
153 imitation-inhibition task (Brass et al., 2005). The present paper focused on the results of the EEB  
154 task only, while the results of the other tasks will be or have been reported elsewhere (Riva et al.,  
155 2018).

156 The EEB paradigm implemented in the current study closely followed the procedure of the second  
157 fMRI experiment described in Silani et al. (Silani et al., 2013). Each trial of the EEB task comprised a  
158 stimulation phase and a rating phase. In the stimulation phase, transient pleasant or unpleasant  
159 affective responses were induced by means of visuo-tactile stimulation of the participants. In one  
160 run, they were instructed to empathize with the feelings of the other participant (i.e., the  
161 confederate). The affective responses elicited in the pairs of participants could be either congruent  
162 (both pleasant or both unpleasant, *congruent condition*) or incongruent (self pleasant and other  
163 unpleasant, or vice versa, *incongruent condition*). The visuo-tactile stimulation consisted of the

164 participants seeing on the screen the picture of an object/animal (e.g., a rose, a snail, maggots)  
165 accompanied by the text “YOU” and simultaneously, their left palm was stroked by an experimenter  
166 using an object whose tactile qualities resembles those of the displayed object or animal. Next to  
167 the first picture, the picture of another object/animal accompanied by the text “OTHER” (see Fig.1)  
168 was displayed on the screen, indicating the object/animal with which the confederate’s palm was  
169 being stroked. The stimulation phase lasted for 3 s. The visual stimuli were presented and seen by  
170 means of a back-projection system installed on the scanner site. Afterwards, participants were  
171 asked to rate the pleasantness of the confederates’ feelings. The ratings were provided on a visual  
172 analogue scale by moving the cursor on the screen using an MR-compatible response box. The  
173 selected screen coordinates were converted offline to a scale ranging from -10 (very unpleasant) to  
174 +10 (very pleasant). The participants were instructed to respond as quickly and accurately as  
175 possible, with a response time limit of 3 s. Offline, the ratings provided in the *incongruent* condition  
176 were compared to the ratings provided in the *congruent* condition. In order to exclude that the  
177 difference in the ratings between the incongruent and the congruent other-judgment conditions  
178 was due to a mere incongruity effect, another run was implemented, during which participants had  
179 to rate their own feelings while undergoing incongruent and congruent stimulation as well (self-  
180 judgment run). For both the self- and the other-judgment runs there were 20 congruent and 20  
181 incongruent trials (10 pleasant and 10 unpleasant). Self- and other-judgment runs were  
182 counterbalanced between participants.

### 183 ***Computation of the EEB score***

184 As in Silani et al. (2013) and Riva et al. (2016), EEB was computed by subtracting the ratings of the  
185 other-judgment *congruent* condition from the ratings of the other-judgment *incongruent* condition  
186 ( $\Delta_{\text{other-judgement}}$ ), from which the corresponding difference between incongruent and congruent



187 ratings in the self-judgment condition ( $\Delta_{\text{self-judgement}}$ ) were subtracted. Hence,  $\text{EEB} = \Delta_{\text{other-judgement}} -$   
188  $\Delta_{\text{self-judgement}}$ . Note that as in previous work, data from the unpleasant trials were multiplied by -1, so  
189 that values across the pleasant and unpleasant trials could be directly compared.

### 190 2.3 Additional measures

191 Self-report measures of depression, trait intersubjective reactivity, alexithymia, and social network  
192 were collected outside the scanner by means of questionnaires. Their purpose was to characterize  
193 better the three groups on different psychological and social dimensions and to explore the role of  
194 several possible confounding factors. Depression was measured by means of the German version  
195 (Hautzinger et al., 2009) of the Beck Depression Inventory (BDI) (Beck et al., 1961), interpersonal  
196 reactivity (personal distress, empathic concern, perspective taking, and fantasy) by means of the  
197 German version of the Interpersonal Reactivity Index (IRI) (Paulus, 2014), and alexithymia by means  
198 of the Bermond Vorst Alexithymia Questionnaire (BVAQ) (Form B; Vorst & Bermond, 2001). For the  
199 social network, three questions were administered: (1) number of friends; (2) number of close  
200 relatives; and (3) frequency of social contacts. See Table 1 for details on analyses and results.

### 201 2.4 Behavioral Analysis

202 An EEB score was computed for each subject and a one-way ANOVA with Group (3 levels: AD, YA,  
203 OA) as a between-group factor was then performed. In case of significant main effects, post hoc  
204 comparisons (Bonferroni adjusted) were computed. In addition, to test our hypothesis of higher EEB  
205 in adolescents and older adults, both quadratic and linear relationships between age and EEB were  
206 tested for significance. For both models the relative AIC (Akaike's information criteria) index was  
207 computed using <http://graphpad.com/quickcalcs/AIC1.cfm>, which was also used to compare the  
208 different models.

## 209 2.5 Functional and structural MRI data acquisition, preprocessing, and analysis

210 Functional MRI scans were acquired using a 3T Siemens Magnetom Trio scanner equipped with a  
211 32-channel head coil. For all participants, a high-resolution structural scan (sagittal T1-weighted  
212 MPAGE sequence: TR: 2300 ms; TE: 2.91 ms; voxel size: 1 mm × 1 mm × 1.2 mm; slice thickness:  
213 1.20 mm; FOV: 356 mm × 356 mm; 192 slices; flip angle: 9°), and field maps were obtained.  
214 Functional images were acquired in interleaved manner using a T2\*-weighted echoplanar imaging  
215 (EPI) sequence with 33 transverse slices covering the whole brain with the following parameters:  
216 slice thickness = 3.0 mm; interslice gap = 0.3 mm; repetition time (TR) = 2060 ms, echo time (TE) =  
217 30 ms; flip angle = 70°, field of view = 192 × 192 mm<sup>2</sup>; matrix size = 64 × 64. Functional MRI data  
218 were preprocessed using SPM12 (Statistical Parametric Mapping, <http://www.fil.ion.ucl.ac.uk/spm>).  
219 Data pre-processing included realignment and un-warping for movement artefacts, correction for  
220 geometric distortions using the acquired fieldmap, slice-time correction, co-registration of the EPI  
221 scans to the skull-stripped T1-weighted structural scan, normalization to the standard stereotaxic  
222 anatomical Montreal Neurological Institute (MNI) space, smoothing with a 6 mm full-width at half-  
223 maximum (FWHM) Gaussian kernel, and resampling of voxel size to 3 mm isotropic. The threshold  
224 used for excluding participants due to excessive motion in the scanner was fixed at 2 mm for  
225 translation and at 2° for rotation.

### 226 *2.5.1 Functional MRI analysis*

227 Following the preprocessing, first-level analysis of the data of each participant was performed  
228 based on the General Linear Model framework as implemented in SPM12 (Friston, Frith, Turner, &  
229 Frackowiak, 1995). In the first-level model, eight regressors of interest convolved with SPM's  
230 canonical hemodynamic response function were included (one for each condition of the design, i.e.,  
231 pleasant incongruent self-judgment, pleasant congruent self-judgment, unpleasant incongruent

232 self-judgment, unpleasant congruent self-judgment, pleasant incongruent other-judgment,  
233 pleasant congruent other-judgment, unpleasant incongruent other-judgment, and unpleasant  
234 congruent other-judgment), along with the corresponding eight regressors of no interest modeling  
235 the rating phase. To account for residual motion artefacts, twelve six nuisance regressors  
236 representing the realignment parameters were incorporated for each run in the first-level model as  
237 well. In line with our previous approach, which did not yield differences related to valence, both  
238 behavioral and neural data were collapsed across the two valence domains. Thus, following model  
239 estimation, the contrast of interest modelling the EEB was computed for each participant: [(pleasant  
240 incongruent - pleasant congruent) + (unpleasant incongruent - unpleasant congruent)]<sub>other-judgment</sub> >  
241 [(pleasant incongruent - pleasant congruent) + (unpleasant incongruent - unpleasant congruent)]<sub>self-</sub>  
242 judgment, and the resulting first-level contrast images were entered in the corresponding group-level  
243 (second level) analysis. For both the functional segregation analyses and the functional connectivity  
244 we then followed the same sequential analysis approach, which consisted of three basic steps. *First*,  
245 we were interested to test, separately for each group, whether there was significant activity within  
246 the rSMG associated to the EEB contrast and whether there was rSMG connectivity with rS1, rS2  
247 and visual cortex (VC), i.e. the areas which had shown significant activity and increased connectivity,  
248 respectively, in the young adult sample of Silani et al. (2013) (in the second, confirmatory  
249 experiment). To this purpose, we generated four masks representing rSMG, S1, S2, and visual cortex  
250 starting from the significant clusters found in Silani et al. (2013). These masks were employed for  
251 the first and the second analysis step. In this first step, we adopted a small volume correction (SVC)  
252 approach, which confined the number of statistical tests to an independently determined area for  
253 which we had strong *a priori* assumptions, thus increasing the sensitivity of the analyses. Note that  
254 this first analysis, when performed on the YA, also allowed us to assess whether we can replicate

255 our previous findings, which had been identified in a group of similarly aged young adults. All SVC  
256 analyses used a family-wise error correction threshold of  $p < 0.05$ , at voxel-level. With the *second*  
257 *step*, our main interest was to test differences among the three groups, both with respect to  
258 segregation and effective connectivity. Moreover, we were interested in exploring the relationship  
259 between individual differences in neural responses, and EEB. We extracted the parameter estimates  
260 for each subject for rSMG (segregation analysis) and for rS1, rS2 and visual cortex (effective  
261 connectivity), and with these values computed group comparisons, correlations with age,  
262 correlations with EEB and, in specific cases, mediation analyses. Correction for number of ROIs was  
263 not applied considered that we tested three *a priori and distinct* hypotheses, one for each area.  
264 *Finally*, while the SVC and ROI analyses of steps 1 and 2 tested activity/connectivity with higher  
265 sensitivity within predefined areas for which we had specific hypotheses, they are agnostic to  
266 potentially relevant activation/connectivity in other parts of the brain. Therefore, we  
267 complemented them with whole-brain analyses, thresholded at  $p < .05$  FWE-corrected at voxel-level.

268 After this description of our general analysis approach, the following paragraphs describe the  
269 specifics and the implementation of the analyses in some more detail.

#### 270 Task-related functional segregation analyses

271 To test rSMG activity related to EEB we performed mass-univariate second-level random effects  
272 analyses and assessed it by means of SVC within the rSMG ROI, separately for each age group. In  
273 the next step, we tested the hypothesis of lower activity in the AD and OA groups by computing  
274 independent T-tests on the mean activity extracted from the rSMG ROI. In addition, as in the  
275 behavioral analysis, both a linear and a quadratic relation between age and EEB-related rSMG  
276 activity were assessed. Activity in rSMG related to EEB was also correlated with EEB scores. Lastly,  
277 we complemented ROIs analyses with whole-brain analysis thresholded at  $p < .05$  FWE-corrected at

278 voxel-level. For the whole-brain analysis we compared adolescents and older adult to young adults,  
279 in both directions ( $YA_{EEB} > AD_{EEB}$ ;  $YA_{EEB} < AD_{EEB}$ ;  $YA_{EEB} > OA_{EEB}$ ;  $YA_{EEB} < OA_{EEB}$ ).

280 Task-related effective connectivity analysis

281 In order to assess how rSMG connectivity with other areas of the brain differs between the three  
282 age groups, we performed psychophysiological interaction analyses (PPI, Friston et al., 1997).  
283 Following the same procedure as in Silani et al. (2013), we first extracted the deconvolved time  
284 course from the seed region rSMG (using the same mask that was used for the univariate analysis).  
285 In the second step, a PPI regressor was obtained as product of the estimated (deconvolved) BOLD  
286 signal of the seed region and the vector representing the psychological variable of interest, namely  
287 the difference between incongruent and congruent conditions in the other-judgment run. In the  
288 third step, single-subject analysis was performed by computing a GLM with the estimated neuronal  
289 activity of the rSMG, the experimental contrast and the PPI regressor. Contrast images for the PPI  
290 regressor were estimated for each subject. The analyses then followed the three steps described  
291 above. We adopted a SVC approach using the masks of the rS1, rS2 and VC to test whether we could  
292 replicate the results found in the YAs by Silani et al. (2013) and to test these same areas in the other  
293 two groups. We then conducted a ROI analysis by extracting the parameter estimates for each  
294 subject for all the three regions and then performed independent T-tests comparing AD and OA to  
295 YA as the reference group. Correlations with age were also computed. Moreover, also in this case,  
296 to explore the relation between differences in EEB and the rSMG connectivity we ran three  
297 correlations with the EEB scores. The results of this analysis suggested mediation analyses (see  
298 results). Mediation analyses were conducted using non-parametric bootstrapping procedures  
299 implemented using an SPSS Macro (Preacher and Hayes, 2008), with 5000 bootstrap resamples.  
300 Statistical significance at  $p < 0.05$  is indicated by the 95% confidence intervals not crossing zero. As

301 a last step, whole-brain analysis was performed and group comparisons were computed, again  
302 comparing AD and OA to YA in both direction.

### 303 *2.5.2 Structural MRI analysis*

304 In addition to functional segregation and connectivity analyses, we analyzed the structural MRI  
305 data by means of voxel-based morphometry (VBM) analyses (Ashburner and Friston, 2000), in order  
306 to investigate age-related differences of rSMG and other areas. Analysis of gray matter volume was  
307 performed via voxel-based morphometry implemented in the CAT12 toolbox  
308 (<http://dbm.neuro.uni-jena.de/cat/>) within SPM12. Preprocessing included bias field correction,  
309 segmentation in gray matter, white matter and cerebrospinal fluid using a segmentation approach  
310 based on adaptive maximum a posterior segmentation and partial volume segmentation. The  
311 resulting segmentations were normalized into Montreal Neurological Institute (MNI) space using  
312 Diffeomorphic Anatomic Registration Through Exponentiated Lie algebra algorithm (DARTEL;  
313 Ashburner, 2007) with the DARTEL MNI template image included with the CAT12 toolbox. The  
314 segmented, normalized and modulated images reflecting gray matter volume were finally  
315 smoothed with an 8 mm FWHM Gaussian kernel and used for subsequent ROI statistical analysis.  
316 ROI analysis was then performed using the rSMG mask also used for the functional analyses. Group  
317 comparisons were computed to explore differences between AD and YA and between OA and YA.  
318 A correlation analysis of the relationship between age and rSMG volume was also performed. Total  
319 intracranial volume (tiv) was included as covariate of no interest in the models. As a last step, group  
320 comparisons at whole-brain level were computed also for the structural data.

321

## 322 3. Results

### 323 3.1 Behavioral results

324 The one-way ANOVA computed on EEB scores revealed a main effect of group ( $F(2,91) = 21.395$ ;  
325  $p < .001$ ; partial  $\eta^2 = .325$ ). Post-hoc comparisons revealed that OA had a significantly higher EEB than  
326 both YA and AD (all  $p < .001$ ) ( $AD_{\text{mean}} = .256$ ,  $AD_{\text{SD}} = 1.068$ ;  $YA_{\text{mean}} = .047$ ,  $YA_{\text{SD}} = 1.622$ ;  $OA_{\text{mean}} = 4.834$ ,  
327  $OA_{\text{SD}} = 5.618$ ), see Fig. 2a. Contrary to our hypothesis, though, no differences between YA and AD  
328 were found. Both the tests of the linear and a quadratic relation between EEB and age were  
329 significant (Linear:  $F(1,91) = 49.970$ ,  $p < .001$ ,  $R^2 = .357$ ; AIC = 167.58; Quadratic:  $F(2,91) = 28.914$ ,  $p$   
330  $< .001$ , AIC = 178.75). However, the comparison of the two models by means of the AIC index  
331 indicated that the linear model is 266.91 times more likely to be correct than the quadratic model  
332 (Fig.2b).

### 333 3.2 Functional MRI results

#### 334 3.2.1 Task-related segregation results

335 The SVC analyses within rSMG showed significant activity in the rSMG in YA (peak voxel at MNI  
336  $x/y/z = 60/-34/40$ ), and thus replicated the findings of Silani et al. (2013). No significant voxels were  
337 found, however, in the AD and in the OA group. Testing differences in rSMG activity among the  
338 three groups revealed no group differences, nor was there any significant correlation, neither linear  
339 nor quadratic, between EEB-related rSMG activity and age. The complementary whole-brain  
340 analyses revealed significant activity in the anterior mid-cingulate cortex (aMCC,  $-3/-4/46$ ) in YA, but  
341 no group differences in this area either. However, group comparisons revealed greater activation  
342 of the right temporal pole ( $36/11/-23$ ) in the OA compared to YA.

### 343 3.2.2 Task-related effective connectivity results

344 In the YA group, significantly increased connectivity between rSMG and rS1 (45/-22/64), rS2 (48/-  
345 19/16) and visual cortex (V4 according to anatomy toolbox, -27/-76/-8) were largely in line with the  
346 results of Silani et al. (2013). In the same vein, AD showed significantly increased connectivity  
347 between rSMG and rS1 (42/-7/55), rS2 (51/-19/16) and the visual cortex (medial/left hemisphere, -  
348 15/-91/-17). On the contrary, OA did not show any significant changes in rSMG connectivity.  
349 Comparisons across groups revealed that OA, compared to YA, showed significantly lower  
350 connectivity of the rSMG with rS1 ( $t(59) = 2.227$ ,  $p = .030$ ), and a trend towards lower connectivity  
351 of the rSMG with rS2 ( $t(59) = 1.936$ ,  $p = .058$ ). No differences were found between AD and YA.  
352 Moreover, a negative correlation was found between age and connectivity of the rSMG with rS1  
353 and rS2 (S1:  $r = -.222$ ,  $p = .034$ , S2:  $r = -.303$ ,  $p = .003$ ). In order to go deeper in the relation between age,  
354 EEB and rSMG connectivity, we performed two mediation analyses with age as the continuous  
355 predictor, EEB as the outcome variable, and in the first one the connectivity between rSMG and rS1  
356 as the mediator, and in the second one the connectivity between rSMG and rS2 as the mediator.  
357 The analyses revealed that the connectivity between rSMG and rS1 did not mediate the effect of age  
358 on the EEB, while we found a significant mediation effect of the connectivity between rSMG and  
359 rS2 with respect to the relation between age and EEB (indirect effect = .008, SE = .0038, 95%  
360 CI = [.0012, .0158]). However, the mediation was only partial since the direct effect of age on EEB  
361 was significant as well ( $p < .05$ ). Lastly, whole-brain analyses revealed a decreased connectivity  
362 associated to increasing age for right visual cortex (21/-88/28), aMCC (-3/26/40), and midbrain (3/-  
363 16/-2).



### 364 3.3 Structural MRI results

365 Group comparisons revealed that AD have greater gray matter volume than YA ( $t(60) = 3.513, p =$   
366  $0.001$ ) and YA greater than OA ( $t(59) = 3.513, p < .001$ ). A significant negative correlation also emerged  
367 between age and rSMG gray matter volume ( $r = -.408, p < .001$ ). Whole-brain analyses, controlling for  
368 total intracranial volume, showed, at an FWE-corrected voxel-level threshold of  $p < .05$ , higher gray  
369 matter volume for AD than YA in a number of clusters, among others and most prominently in the  
370 superior medial frontal gyrus, the right angular gyrus/temporoparietal cortex, the medial parietal  
371 cortex including the precuneus and the posterior cingulate cortex. YA had more gray matter than  
372 OA in all of these regions and in additional extended clusters, including medial occipital cortex,  
373 bilateral cerebellar regions, lateral frontal, parietal and temporal regions, the bilateral insula and  
374 subcortical regions. No significantly higher gray matter volume were found in OA compared to YA  
375 and in YA compared to AD.

#### 376 4. Discussion

377 We used a multi-level neuroimaging approach, combining morphometry, functional segregation  
378 and task-related connectivity analyses, to shed light on the neural underpinnings of age-related  
379 differences in emotional egocentricity. Our main findings include a) the replication of the  
380 involvement of rSMG and its connectivity in overcoming emotional egocentricity in young adults; b)  
381 the partial replication of previous behavioral findings, that adults over around 60 years show higher  
382 EEB than young adults, from whom adolescents (contrasting our prediction) do not differ; c) the  
383 association between age-related changes in EEB and changes in rSMG effective connectivity with  
384 somatosensory cortices, subtended by structural changes in rSMG across the lifespan.

385 More in details, the previous finding (Riva et al., 2016) that older adults are more emotionally  
386 egocentric than young adults was replicated, whereas adolescents did not show higher EEB than  
387 the young adults – thus being in contrast with our predictions.

388 With regard to the neural underpinnings of emotional egocentrism in young adults, results from  
389 both the functional segregation and the effective connectivity analyses replicated previous findings  
390 reported in a sample of similar age (Silani et al., 2013): Young adults showed indeed significant  
391 activity in the rSMG related to EEB, and increased effective connectivity between rSMG and rS1,  
392 rS2, and the visual cortex. This confirms the view that rSMG is an area crucial for reducing EEB, and  
393 that this is achieved by connecting with sensory-perceptual areas to implement self-other  
394 distinction (see also Kanske et al., 2015; Hoffmann et al., 2016). The complementary whole-brain  
395 analysis revealed that overcoming EEB was also related to significant activity in the aMCC, an area  
396 (amongst others) involved in task monitoring, conflict resolution (Weissman et al., 2003; Kim et al.,  
397 2011), and affect regulation in the domain of empathy (Lamm et al., 2019, for review).

398 With regard to the older adults, no significant EEB-related rSMG activity emerged, though direct  
399 comparison between young and older adults did not reveal a significant difference. However,  
400 significant lower connectivity between rSMG and rS1 and a trend towards significant connectivity  
401 with rS2 was observed, compared to young adults. Mediation analysis revealed the connectivity of  
402 rSMG with rS2 to be a partial mediator of the relationship between age and EEB, uncovering the  
403 relevance of the task-related rSMG connectivity in overcoming EEB. These findings might be related,  
404 at the structural level, to the observation of smaller gray matter volume in the rSMG compared to  
405 the young adults. Whole-brain analysis moreover showed that older adults, compared to young  
406 adults, presented significantly higher activity in the temporal pole, an area involved, among other  
407 things, in socio-cognitive processes (Pehrs et al., 2017). A compensatory mechanism of the older  
408 brain dealing with less efficient brain activity (Cabeza et al., 2002; Reuter-Lorenz and Cappell, 2008)  
409 might be at the origin of this result. Note though that this result was not predicted *a priori* and  
410 should be regarded as exploratory.

411 On the other end of the lifespan, adolescents did not display themselves as more egocentric than  
412 young adults. Different reasons may account for the deviation from the present from our previous  
413 findings. First, in the previous (behavioral) study ratings had been collected using a response device  
414 (a touch screen) that enabled faster and more automatic responses. In the present MRI study,  
415 responses had to be collected by moving a cursor on the response scale. The possibility to adjust  
416 the cursor position while entering the response might resulted in additional time and reflection to  
417 overcome and control for initial bias. Note that this discrepancy between response modalities has  
418 also been reported in our previous studies (Silani et al., 2013) in young adults, and also may account  
419 for a lack of significant EEB in the YA group. Another reason might be a difference in the two  
420 adolescent samples, which, amongst general sampling issues, might be due to possible cultural and

421 educational differences, as data were collected in different countries (Italy and Austria). At the brain  
422 level, adolescents showed greater gray matter volume in rSMG compared to young adults, which is  
423 likely to indicate ongoing development processes, such as pruning and myelination, as proposed by  
424 various researchers (Ducharme et al., 2015; Tamnes et al., 2017). In line with such ongoing  
425 development and differentiation of the rSMG, no significant activity in this area was found for the  
426 EEB contrast; although, as for the older adults, no significant differences emerged between  
427 adolescents and young adults. Notably, and differently from the older adults, no significant  
428 differences occurred between adolescents and young adults in rSMG effective connectivity. Indeed,  
429 significant task-related connectivity between rSMG and rS1, rS2 and visual cortex was also observed  
430 in the adolescents.

431 Considering data from both adolescents and older adults, age-related changes in rSMG  
432 connectivity seems to play a central role in changes of emotional egocentricity across different ages.  
433 When considering the whole sample, increasing age has been found to negatively correlate with  
434 connectivity between rSMG and somatosensory cortices, and in particular the coupling between  
435 rSMG and rS2 partially mediates the relationship between age and EEB. S2 is a brain area involved  
436 in a variety of processes, from the perception of touch intensity (Case et al., 2017) to emotional  
437 processing (Adolphs et al., 2000) and attentional modulation of somatosensory stimuli (Chen et al.,  
438 2008). Importantly, in addition to being activated by first-person touch stimulation, S2 has been  
439 associated to observation of vicarious touch (Keysers et al., 2004) and to empathy for touch (Jackson  
440 et al., 2006). Thus, a possible, though speculative, interpretation might be that both self- and other-  
441 related emotional experiences are represented in S2 and transferred to rSMG. In young adults,  
442 when the two representations are incongruent, the coupling between S2 and rSMG increases,  
443 possibly because of the higher complexity/greater quantity of information exchanged with rSMG.

444 Being a central area for self-other distinction in the emotional domain (Silani et al., 2013; Steinbeis  
445 et al., 2014), rSMG keeps separated and weights information related to one's own and to the other's  
446 emotional states, providing the basis of the empathic judgment. However, since the increase in the  
447 rSMG-rS2 coupling is not observed in older adults, this might suggest that the complexity associated  
448 to simultaneous incongruent emotional states between self and other is not transferred to the  
449 rSMG. Thus, participants in this group may use the more salient representation (i.e., the self) to  
450 inform their empathic judgment resulting in a higher egocentric bias.

451 The relation between age and task-free functional connectivity (e.g.: resting state) have been fairly  
452 extensively investigated (Geerligs et al., 2014, 2015; for a review on aging: Damoiseaux, 2017;  
453 McCormick et al., 2018) and showed associations between age-related differences in  
454 social/cognitive abilities and age-related changes in task-free functional networks (e.g.: default  
455 mode network). However, less investigated is the relation between age-related changes in socio-  
456 cognitive processes and differences occurring with development and aging in task-related effective  
457 connectivity. The current study provides an example of how differences in regional functional  
458 activity might not always be able to account for age-related differences in (socio)cognitive  
459 processes, whereas task-related functional connectivity might play a key role in identifying these  
460 differences. Thus, a more systematical and regular analysis of task-related effective connectivity in  
461 investigating age-related differences in brain functionality seems advisable for future investigations.

462 Despite several strengths, there are also some limitations that need specific consideration. First,  
463 the confederate playing the "other" in the task was a young adult for all the three groups and this  
464 might have influenced the degree to which the participants were able to empathize with them. In  
465 this respect it is important to note that the present sample (as reported in Riva et al., 2018) did not  
466 reveal any behavioral indications of increased difficulty to empathize, although we did observe

467 differences in empathy-related anterior insula activity. Future studies are thus needed to test  
468 whether the present findings generalize to empathy with age-matched persons. Second, as in any  
469 cross-sectional study, factors associated to cohorts rather than age might have played a role. Third,  
470 despite our paradigm has been already employed in different studies/experiments (Silani et al.,  
471 2013; Tomova et al., 2014; Riva et al., 2016), the extension of the present results to other types of  
472 paradigm investigating the EEB (Steinbeis et al., 2014; von Mohr et al., 2019) is required. Finally, the  
473 use of a female sample, for the reasons outlined above, requires further research to test whether  
474 the present results extend to the male population.

#### 475 **Conclusions**

476 The current study confirms that older age is associated with higher EEB than in young adults.  
477 Whether or not adolescents show higher EEB remains controversial considering on the non-  
478 replication of previous findings. We also corroborated that, in young adults, rSMG is a central area  
479 for efficient self-other distinction in the emotional domain. At the same time, age-related  
480 differences in emotional egocentricity seem to be better explained by differences in the effective  
481 connectivity of the rSMG with somatosensory cortices, and especially with rS2. Taken together, the  
482 present and previous findings suggest that rSMG works in interaction with other, predominately  
483 sensory-perceptual brain areas to integrate as well as to differentiate affective information  
484 pertaining to self and other.

485        5. References

- 486        Adolphs R, Damasio H, Tranel D, Cooper G, Damasio AR (2000) A role for somatosensory cortices in the  
487                visual recognition of emotion as revealed by three-dimensional lesion mapping. *J Neurosci* 20:2683–  
488                2690.
- 489        Batson CD (2009) These things called empathy: Eight related but distinct phenomena. In: *The social  
490                neuroscience of empathy.*, pp 3–15 Social neuroscience. Cambridge, MA, US: MIT Press.
- 491        Beck A, Ward C, Mendelson M, Mock J, Erbaugh J (1961) An inventory for measuring depression. *Arch Gen  
492                Psychiatry* 4:561–571.
- 493        Brass M, Derrfuss J, von Cramon DY (2005) The inhibition of imitative and overlearned responses: a  
494                functional double dissociation. *Neuropsychologia* 43:89–98.
- 495        Cabeza R, Anderson ND, Locantore JK, McIntosh AR (2002) Aging Gracefully: Compensatory Brain Activity  
496                in High-Performing Older Adults. *Neuroimage* 17:1394–1402.
- 497        Case LK, Laubacher CM, Richards EA, Spagnolo P, Olausson H, Bushnell MC (2017) Inhibitory rTMS of  
498                secondary somatosensory cortex reduces intensity but not pleasantness of gentle touch. *Neurosci Lett*  
499                653:84–91.
- 500        Chen TL, Babiloni C, Ferretti A, Perrucci MG, Romani GL, Rossini PM, Tartaro A, Del Gratta C (2008) Human  
501                secondary somatosensory cortex is involved in the processing of somatosensory rare stimuli: An fMRI  
502                study. *Neuroimage* 40:1765–1771.
- 503        Chen Y-C, Chen C-C, Decety J, Cheng Y (2014) Aging is associated with changes in the neural circuits  
504                underlying empathy. *Neurobiol Aging* 35:827–836.
- 505        Courchesne E, Chisum HJ, Townsend J, Cowles A, Covington J, Egaas B, Harwood M, Hinds S, Press GA,  
506                Address JT (2000) Normal Brain Development and Aging : Quantitative Analysis at in Vivo MR.  
507                *Radiology* 216:672–682.
- 508        Damoiseaux JS (2017) Effects of aging on functional and structural brain connectivity. *Neuroimage* 160:32–

- 509 40.
- 510 de Vignemont F, Singer T (2006) The empathic brain: how, when and why? *Trends Cogn Sci* 10:435–441.
- 511 Decety J, Michalska KJ (2010) Neurodevelopmental changes in the circuits underlying empathy and  
512 sympathy from childhood to adulthood. *Dev Sci* 13:886–899.
- 513 Ducharme S et al. (2015) Trajectories of cortical surface area and cortical volume maturation in normal  
514 brain development. *Data Br* 5:929–938.
- 515 Friston KJ, Buechel C, Fink GR, Morris J, Rolls E, Dolan RJ (1997) Psychophysiological and modulatory  
516 interactions in neuroimaging. *Neuroimage* 6:218–229.
- 517 Friston KJ, Frith CD, Turner R, Frackowiak RS (1995) Characterizing Evoked Hemodynamics with fMRI.  
518 *Neuroimage* 2:157–165.
- 519 Geerligs L, Maurits NM, Renken RJ, Lorist MM (2014) Reduced specificity of functional connectivity in the  
520 aging brain during task performance. *Hum Brain Mapp* 35:319–330.
- 521 Geerligs L, Renken RJ, Saliassi E, Maurits NM, Lorist, M. M (2015) A brain-wide study of age-related changes  
522 in functional connectivity. *Cereb Cortex* 25:1987–1999.
- 523 Giedd JN, Blumenthal J, Jeffries NO, Castellanos FX, Liu H, Zijdenbos A (1999) Brain development during  
524 childhood and adolescence : a longitudinal MRI study. *Nat Neurosci* 2:861–863.
- 525 Gogtay N, Giedd JN, Lusk L, Hayashi KM, Greenstein D, Vaituzis AC, Lii TFN, Herman DH, Clasen LS, Toga AW,  
526 Rapoport JL, Thompson PM (2004) Dynamic mapping of human cortical development during childhood  
527 through early adulthood. *Proc Natl Acad Sci* 101:8174–8179.
- 528 Hautzinger M, Keller F, Kühner C (2009) BDI-II. Beck-Depressions-Inventar. Revision (2 Auflage). Frankfurt  
529 am Main: Edition Pearson Assessment.
- 530 Hoffmann F, Koehne S, Steinbeis N, Dziobek I, Singer T (2016) Preserved Self-other Distinction During  
531 Empathy in Autism is Linked to Network Integrity of Right Supramarginal Gyrus. *J Autism Dev Disord*  
532 46:637–648.
- 533 Hoffmann F, Singer T, Steinbeis N (2015) Children’s Increased Emotional Egocentricity Compared to Adults



- 534 Is Mediated by Age-Related Differences in Conflict Processing. *Child Dev* 86:765–780.
- 535 Jackson PL, Brunet E, Meltzoff AN, Decety J (2006) Empathy examined through the neural mechanisms  
536 involved in imagining how I feel versus how you feel pain. *Neuropsychologia* 44:752–761.
- 537 Kanske P, Böckler A, Trautwein FM, Singer T (2015) Dissecting the social brain: Introducing the EmpaToM  
538 to reveal distinct neural networks and brain-behavior relations for empathy and Theory of Mind.  
539 *Neuroimage* 122:6–19.
- 540 Kessler J, Markowitsch HJ, Denzler P (2000) Mini-Mental-Status-Test (MMST).
- 541 Keysers C, Wicker B, Gazzola V, Anton J-L, Fogassi L, Gallese V (2004) A Touching Sight: SII/PV Activation  
542 during the Observation and Experience of Touch. *Neuron* 42:335–346.
- 543 Kim C, Kroger JK, Kim J (2011) A functional dissociation of conflict processing within anterior cingulate  
544 cortex. *Hum Brain Mapp* 32:304–312.
- 545 Kukull WA, Larson EB, Teri L, Bowen J, McCormick W, Pfanschmidt ML (1994) The mini-mental state  
546 examination score and the clinical diagnosis of dementia. *J Clin Epidemiol* 47:1061–1067.
- 547 Lamm C, Rütgen M, Wagner IC (2019) Imaging empathy and prosocial emotions. *Neurosci Lett* 693:49–53.
- 548 McCormick EM, van Hoorn J, Cohen JR, Telzer EH (2018) Functional connectivity in the social brain across  
549 childhood and adolescence. *Soc Cogn Affect Neurosci* 13:819–830.
- 550 Oldfield RC (1971) The assessment and analysis of handedness: the Edinburgh inventory. *Neuropsychologia*  
551 9:97–113.
- 552 Paulus C (2014) Der Saarbrücker Persönlichkeitsfragebogen SPF (IRI) zur Messung von Empathie [German  
553 Version of the Interpersonal Reactivity Index]. In. University of Saarbrücken: Dr Christoph Paulus.  
554 Available at: [http://bildungswissenschaften.uni-](http://bildungswissenschaften.uni-saarland.de/personal/paulus/homepage/empathie.html)  
555 [saarland.de/personal/paulus/homepage/empathie.html](http://bildungswissenschaften.uni-saarland.de/personal/paulus/homepage/empathie.html).
- 556 Pehrs C, Zaki J, Schlochtermeyer LH, Jacobs AM, Kuchinke L, Koelsch S (2017) The Temporal Pole Top-Down  
557 Modulates the Ventral Visual Stream During Social Cognition. *Cereb Cortex* 27:777–792.
- 558 Reuter-Lorenz PA, Cappell KA (2008) Neurocognitive aging and the compensation hypothesis. *Curr Dir*

559 Psychol Sci 17:177–182.

560 Riva F, Triscoli C, Lamm C, Carnaghi A, Silani G (2016) The Emotional Egocentricity Bias across the life-span.  
561 Front Aging Neurosci 8:74.

562 Riva F, Tschernegg M, Chiesa PA, Wagner IC, Kronbichler M, Lamm C, Silani G (2018) Age-related differences  
563 in the neural correlates of empathy for pleasant and unpleasant touch in a female sample. Neurobiol  
564 Aging 65:7–17.

565 Schulte-Rüther M, Markowitsch HJ, Shah NJ, Fink GR, Piefke M (2008) Gender differences in brain networks  
566 supporting empathy. Neuroimage 42:393–403.

567 Silani G, Lamm C, Ruff CC, Singer T (2013) Right Supramarginal Gyrus Is Crucial to Overcome Emotional  
568 Egocentricity Bias in Social Judgments. J Neurosci 33:15466–15476.

569 Singer T, Lamm C (2009) The social neuroscience of empathy. Ann N Y Acad Sci 1156:81–96.

570 Sowell ER, Peterson BS, Thompson PM, Welcome SE, Henkenius AL, Toga AW (2003) Mapping cortical  
571 change across the human life span. Nat Neurosci 6:309–315.

572 Steinbeis N, Bernhardt BC, Singer T (2014) Age-related differences in function and structure of rSMG and  
573 reduced functional connectivity with DLPFC explains heightened emotional egocentricity bias in  
574 childhood. Soc Cogn Affect Neurosci:1–9.

575 Tamm S, Nilsson G, Schwarz J, Lamm C, Kecklund G, Petrovic P, Fischer H, Åkerstedt T, Lekander M (2017)  
576 The effect of sleep restriction on empathy for pain: An fMRI study in younger and older adults. Sci Rep  
577 7:12236.

578 Tamnes CK, Herting MM, Goddings A-L, Meuwese R, Blakemore S-J, Dahl RE, Güroğlu B, Raznahan A, Sowell  
579 ER, Crone EA, Mills KL (2017) Development of the Cerebral Cortex across Adolescence: A Multisample  
580 Study of Inter-Related Longitudinal Changes in Cortical Volume, Surface Area, and Thickness. J  
581 Neurosci 37:3402–3412.

582 Tomova L, von Dawans B, Heinrichs M, Silani G, Lamm C (2014) Is stress affecting our ability to tune into  
583 others? Evidence for gender differences in the effects of stress on self-other distinction.

584 Psychoneuroendocrinology 43:95–104.

585 von Mohr M, Finotti G, Ambroziak KB, Tsakiris M (2019) Do you hear what I see? An audio-visual paradigm  
586 to assess emotional egocentricity bias. PsyArXiv April, 1.

587 Vorst HCM, Bermond B (2001) Validity and reliability of the Bermond–Vorst Alexithymia Questionnaire. Pers  
588 Individ Dif 30:413–434.

589 Weissman DH, Giesbrecht B, Song AW, Mangun GR, Woldorff MG (2003) Conflict monitoring in the human  
590 anterior cingulate cortex during selective attention to global and local object features. Neuroimage  
591 19:1361–1368.

592

## 6. Tables and Figures

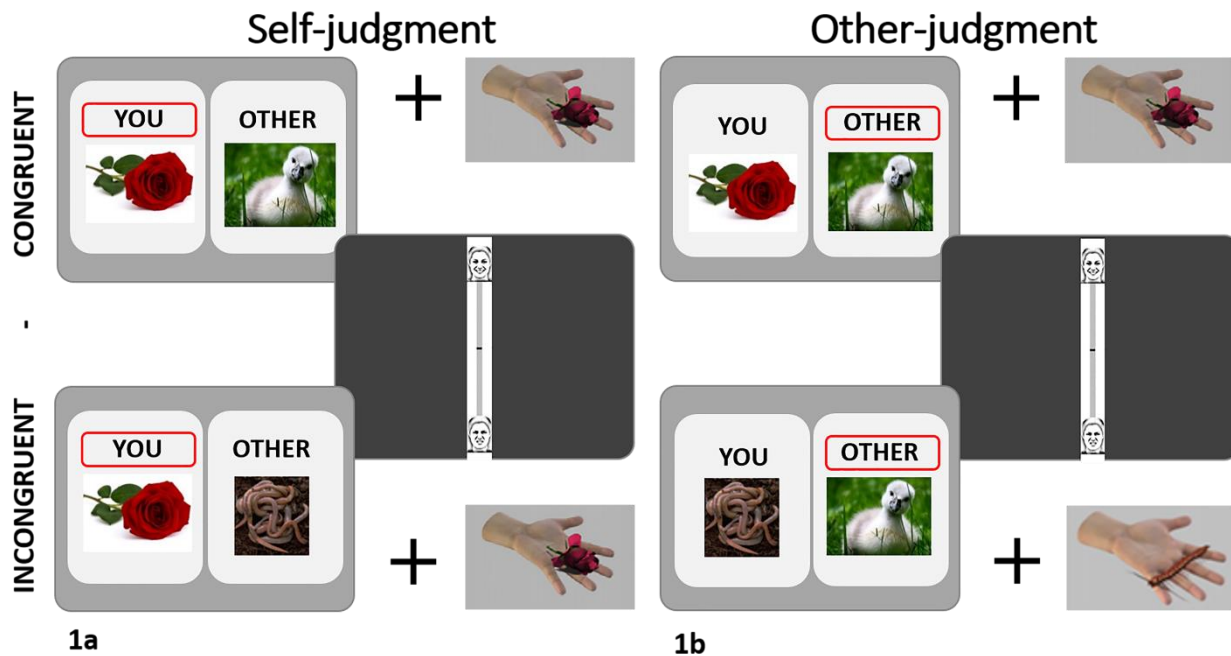

593

594 **Fig 1.** Experimental paradigm. **1a.** Self-judgment condition: participants are stroked on the palm  
595 with an object and simultaneously see on the screen an object corresponding to the touch, as well  
596 as an object indicating the touch experienced by the other participant (in reality, a confederate).  
597 The affective responses elicited in the two participants could be either congruent (upper panel) or  
598 incongruent (bottom panel). In the self-condition, participants were asked to report their own  
599 affective state during the visuo-tactile stimulation, using a visual analogue scale. **1b.** Other-  
600 judgment condition: stimulation and conditions are similar to the self-judgment condition, but  
601 participants are instructed to empathize with the other participant, and to provide ratings on their  
602 presumed affective responses.

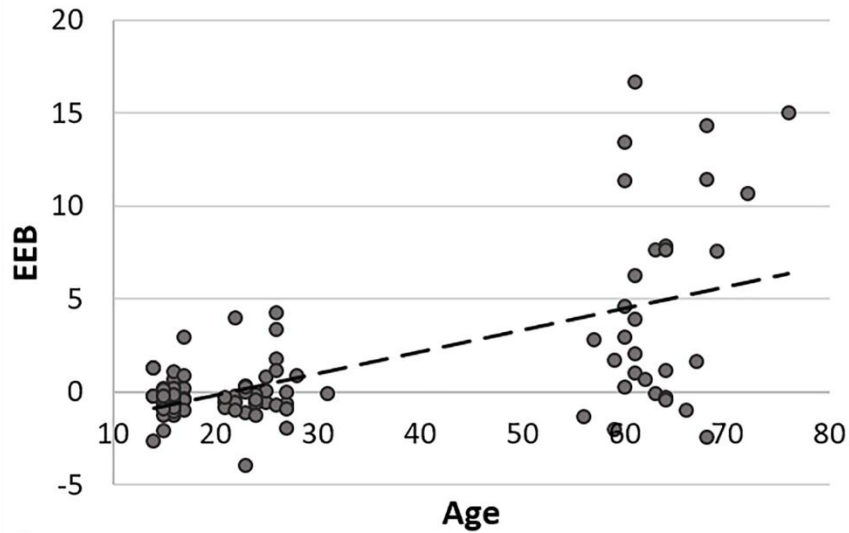

603 **2a**

604

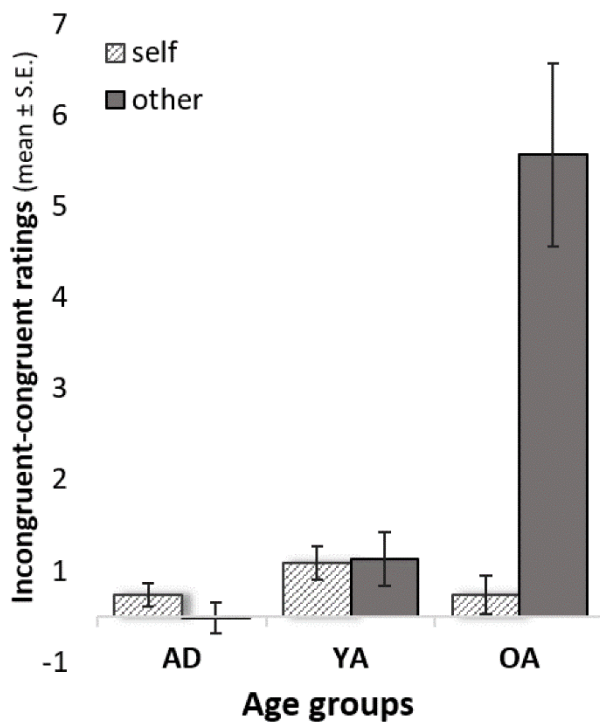

605 **2b**

606

607 **Fig. 2.** EEB at different ages. **2a.** Scatterplot of individual EEB (y-axis) values in adolescents, young

608 adults and older adults (age on x-axis). **2b.** Differences between ratings provided in incongruent vs.

609 congruent trials, separately for self- and other-judgment conditions. While no group differences

emerged in the self-judgment condition, older adults showed, compared to the other two groups,

610 a significantly higher incongruity effect in the other-judgment condition, giving rise to a higher EEB  
611 (see text).  
612

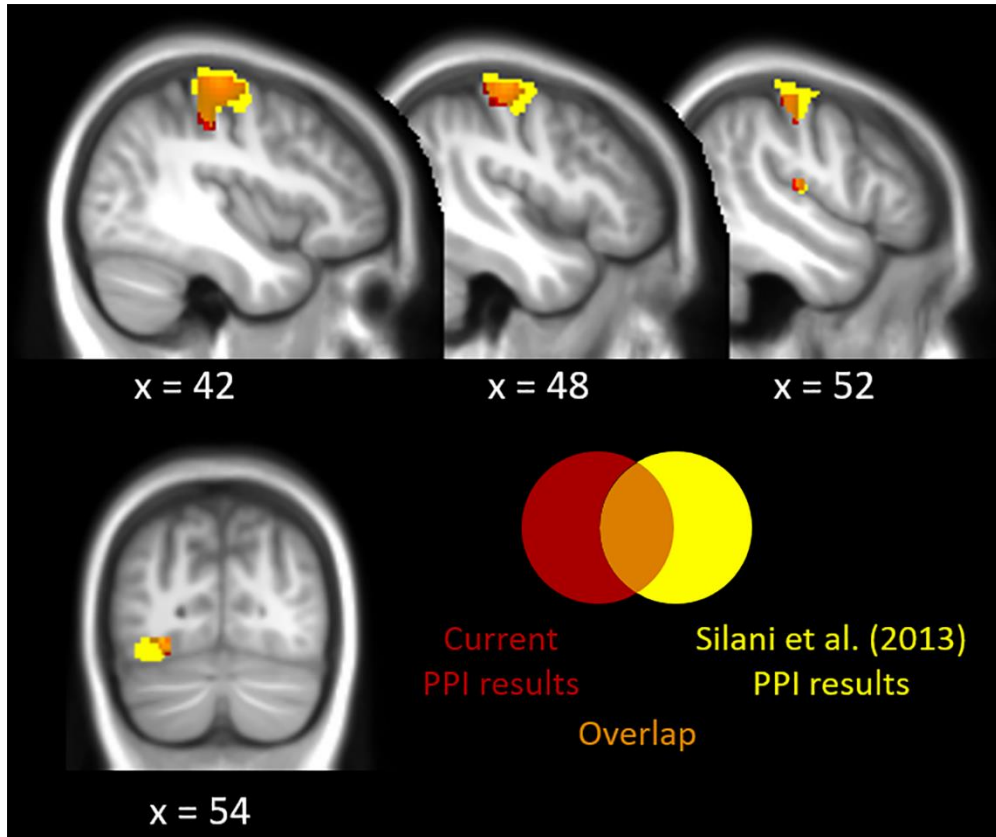

613  
614 **Fig. 3.** Brain regions showing increased effective connectivity (PPI analysis) with the rSMG in young  
615 adults: S1, S2 (sagittal view) and VC (coronal view) ( $p=.005$  FWE). These results (in red) replicated  
616 previous results (in yellow) (Silani et al. 2013), as indicated by the orange overlap between the  
617 present and the previous study.

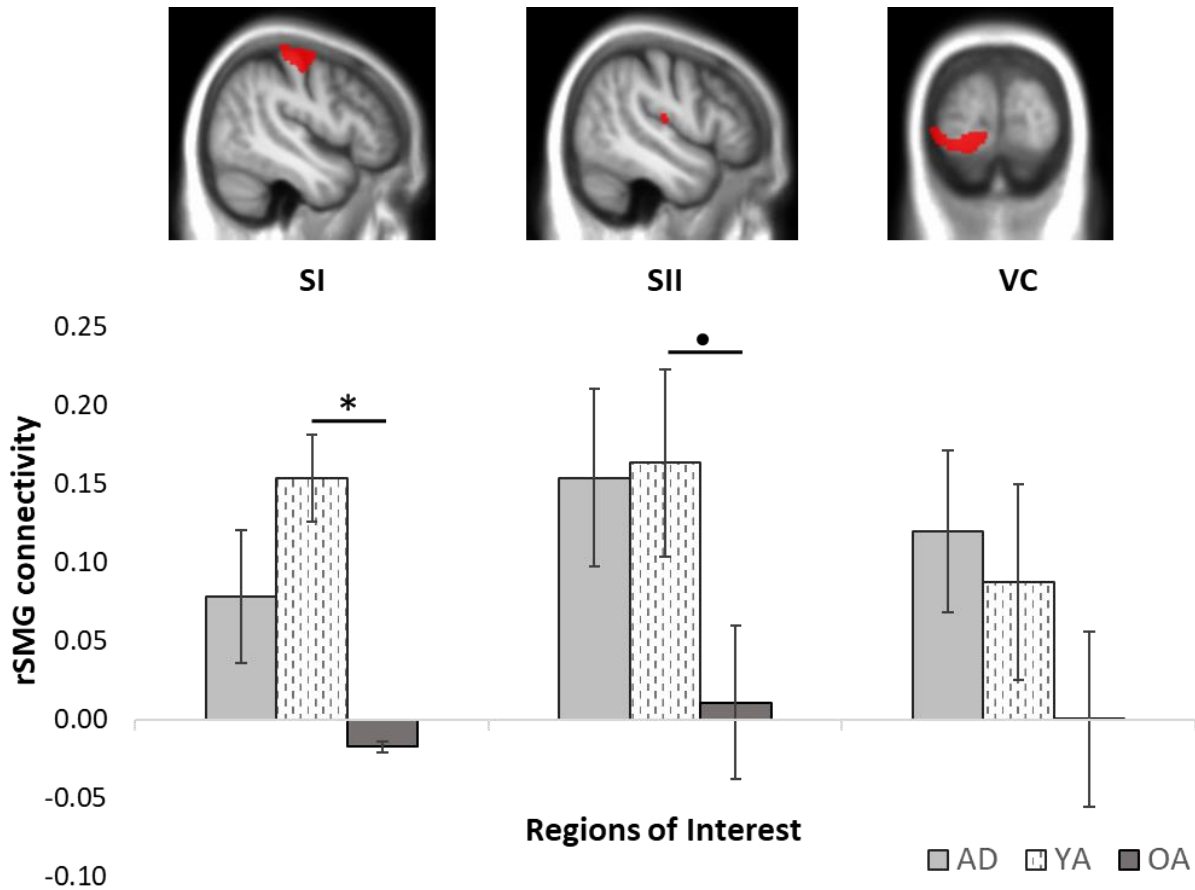

618

619

620 **Fig. 4.** Group differences of effective connectivity between rSMG and S1, S2 and visual cortex (VC).

621 Older adults showed lower effective connectivity of the rSMG with S1 and S2 compared to the young

622 adults, while no differences emerged between adolescents and young adults. The top of the figure

623 shows the location and the extent of the ROI masks, built from the corresponding results in Silani et

624 al. (2013) (see text for details).

625

626

627

| Self-reported measures       | Adolescents Mean (SD) | Young adults Mean (SD) | Older adults Mean (SD) | Results     |
|------------------------------|-----------------------|------------------------|------------------------|-------------|
| BDI                          | 8.82 (5.63)           | 8.83 (6.98)            | 7 (5.004)              | =           |
| <b>IRI</b>                   |                       |                        |                        |             |
| Empathic concern             | 14.75 (2.27)          | 16.17 (5.48)           | 15.77 (2.67)           | YA>AD*      |
| Personal distress            | 11.14 (3.44)          | 15.17 (3.09)           | 13.42 (2.28)           | =           |
| Fantasy scale                | 16.07 (2.61)          | 12.00 (2.49)           | 11.04 (2.85)           | OA<YA,AD*   |
| Perspective taking           | 12.79 (2.91)          | 14.90 (2.44)           | 15.42 (3.26)           | AD<YA,OA*   |
| <b>BVAQ</b>                  |                       |                        |                        |             |
| Emotionalizing scale         | 8.00 (2.67)           | 7.80 (2.76)            | 8.07 (2.68)            | =           |
| Verbalizing scale            | 11.48 (3.50)          | 9.40 (3.39)            | 8.89 (2.94)            | AD>OA*      |
| Fantasizing scale            | 9.50 (3.64)           | 10.00 (3.40)           | 12.46 (4.24)           | OA > YA,AD* |
| Identifying scale            | 9.54 (3.11)           | 9.43 (3.12)            | 6.73 (2.41)            | YA,AD>OA*   |
| Analyzing scale              | 7.96 (2.30)           | 7.77 (2.10)            | 7.86 (2.55)            | =           |
| <b>Social network size</b>   |                       |                        |                        |             |
| N. of friends                | 6.35 (2.70)           | 6.8 (3.67)             | 7.43 (4.85)            | =           |
| N. of close relatives        | 6.55 (5.48)           | 6.1 (4.44)             | 7.50 (4.84)            | =           |
| Frequency of social contacts | 2.32 (0.75)           | 2.30 (0.95)            | 2.80 (0.66)            | =           |

628

629 **Table 1.** The results from the self-reported measures are presented. One-way ANOVAs were  
630 computed for the BDI (Hautzinger et al., 2009) and for each of the social network questions. In case  
631 of significance, Bonferroni-corrected pairwise comparisons were calculated to compare groups.



632 Two multivariate ANOVAs were computed for the IRI (Paulus, 2014) and the BVAQ (Vorst and  
633 Bermond, 2001) including scales as a within-group factor (4 levels for IRI, 5 levels for BVAQ) and  
634 group as a between-group factor (3 levels), to correct for multiple comparisons of the sub-scales of  
635 each questionnaire. In case the interaction *questionnaire \* group* was significant, Bonferroni-  
636 corrected post-hoc pairwise comparisons were computed for each subscale comparing the groups.  
637 Analyses were computed using SPSS v.25 (Statistical Package for the Social Sciences, IBM SPSS Inc.,  
638 Chicago, IL, USA). \*p-value <.05, Bonferroni post-doc test p<.05.
